1 **Title: Neurodevelopmental outcomes of infants secondary to in utero exposure to maternal**  
2 **SARS-CoV-2 infection: A national prospective study in Kuwait**

3 <sup>1</sup>Mariam Ayed, <sup>1</sup>Alia Embaireeg, <sup>2</sup>Mais Kartam, <sup>3</sup>Kiran More, <sup>4</sup>Mafaza Alqallaf, <sup>5</sup>Abdullah  
4 AlNafisi, <sup>2</sup>Zainab Alsaffar, <sup>4</sup>Zainab Bahzad, <sup>2</sup>Yasmeen Buhamad, <sup>6</sup>Haneen Alsayegh, <sup>7</sup>Wadha  
5 Al-Fouzan, <sup>2</sup>Hessa Alkandari

6 <sup>1</sup>Mariam Ayed, MD, FAAP, FRCPC Neonatal Department, Farwaniya Hospital, Kuwait. Email:  
7 mariam.ayed@hsc.edu.kw

8 <sup>1</sup>Alia Embaireeg, MD, KBP. Neonatal Department, Farwaniya Hospital, Kuwait. Email:  
9 a.embaireeg@gmail.com

10 <sup>2</sup>Mais Kartam, MD. Paediatric Department, Farwaniya Hospital, Kuwait. Email:  
11 maiskartam94@hotmail.com

12 <sup>3</sup>Kiran Moore. MD. Division of Neonatology, Sidra Medicine, Doha, Qatar. Weill Cornell  
13 Medicine, Doha, Qatar

14 <sup>4</sup>Mafaza Alqallaf, MD. Paediatric Department, Adan Hospital, Kuwait. Email:  
15 mafaza.alqallaf@gmail.com

16 <sup>5</sup>Abdullah AlNafisi, MD. Paediatric Department, Sabah Hospital, Kuwait. Email:  
17 a.nafisi@outlook.com

18 <sup>2</sup>Zainab Alsaffar, MD. Paediatric Department, Farwaniya Hospital, Kuwait. Email:  
19 zainabys@hotmail.com

20 <sup>4</sup>Zainab Bahzad, MD. Paediatric Department, Adan Hospital, Kuwait. Email:  
21 Zainab20bahzad@gmail.com

22 <sup>5</sup>Yasmeen Buhamad, MD. Paediatric Department, Farwaniya Hospital, Kuwait. Email: YHB-  
23 95@live.com

24 <sup>6</sup>Haneen Alsayegh, MD. Paediatric Department, Amiri Hospital, Kuwait. Email:  
25 H\_alsayegh5@hotmail.com

26 <sup>7</sup>Wadha Al-Fouzan, MD. Department of Microbiology, Faculty of Medicine, Kuwait University,  
27 Jabriya, Kuwait. Email: alfouzan.w@ku.edu.kw

28 <sup>2</sup>Hessa Alkandari, MD. Pediatric Department, Farwaniya Hospital, Kuwait. Email:  
29 hessa.alkandari@dasmaninstitute.org

30 **CORRESPONDING AUTHOR:**

31 Mariam Ayed, Neonatal Department, Farwaniya Hospital, Subah An Nasser, Kuwait City, Postal  
32 code-81400, Kuwait, Tel: 965-98880553, Mariam.ayed@hsc.edu.kw

33

34

35

36

37

38

39

40

## 41 **Abstract**

### 42 Background

43 An increasing proportion of women are being infected with severe acute respiratory syndrome  
44 coronavirus 2 (SARS-CoV-2) during pregnancy. Intrauterine viral infections induce an increase  
45 in the levels of proinflammatory cytokines, which inhibit the proliferation of neuronal precursor  
46 cells and stimulate oligodendrocyte cell death, leading to abnormal neurodevelopment. Whether  
47 a maternal cytokine storm can affect neonatal brain development is unclear. The objective of the  
48 present study is to assess neurodevelopmental outcomes in neonates born to mothers with SARS-  
49 CoV-2 infections during pregnancy.

### 50 Methods

51 In this prospective cohort study, the neurodevelopment status of infants (N=298) born to women  
52 with SARS-CoV-2 infections during pregnancy was assessed at 10-12 months post discharge  
53 using the Ages and Stages Questionnaire, 3rd edition (ASQ-3). The ASQ-3 scores were  
54 classified into developmental delays (cutoff score:  $\leq 2$  standard deviations (SDs) below the  
55 population mean) and no delay (score  $> 2$  SDs above the population mean).

### 56 Results

57 Approximately 10% of infants born to mothers with SARS-CoV-2 infections during pregnancy  
58 showed developmental delays. Two of 298 infants tested positive for SARS-CoV-2, and both  
59 had normal ASQ-3 scores. The majority of the pregnant women had SARS-CoV-2 infection  
60 during their third trimester. The risk of developmental delays among infants was higher in those  
61 whose mothers had SARS-CoV-2 infections during the first (P=0.039) and second trimesters  
62 (P=0.001) than in those whose mothers had SARS-CoV-2 infections during the third trimester.

63 Infants born at <31 weeks gestation were more prone to developmental delays than those born at  
64 >31 weeks gestation (10% versus 0.8%; P=0.002).

65 Conclusion

66 The findings of the study highlight the need for long term neurodevelopmental assessment of  
67 infants born to mothers with SARS-CoV-2 infection.

68 **Key Words:** Coronavirus 2019 (SARS-CoV-2), Pregnancy, Neurodevelopment of infants,  
69 Perinatal transmission

70

71 **Background**

72 Severe acute respiratory syndrome coronavirus 2 (SARS-CoV-2), which causes coronavirus  
73 disease-19 (COVID-19), has been spreading rapidly worldwide, increasingly affecting even  
74 pregnant females. Pregnancy-associated physiological changes, as well as altered cell-mediated  
75 immunity, enhance the susceptibility of pregnant women to infections by intracellular organisms  
76 such as viruses. Based on a living systematic review and meta-analysis, overall, 10% (95%  
77 confidence interval (CI): 7-12%; 73 studies involving 67271 women) of pregnant and recently  
78 pregnant women attending or admitted to the hospital for any reason were diagnosed as having  
79 suspected or confirmed SARS-CoV-2 infection [1]. Hence, a growing proportion of pregnant  
80 women become infected with SARS-CoV-2 during various trimesters of pregnancy, with  
81 variable effects on the fetus [1,2].

82

83 Furthermore, the underdeveloped innate and adaptive immune systems of fetuses and neonates  
84 also make them more susceptible to infections [3, 4]. Maternal-fetal transmission of SARS-CoV-  
85 2 has not been widely established to date, and findings vary. A meta-analysis revealed that

86 vertical transmission of SARS-CoV-2 is possible and—showed that only 3.2% (27 of 936; 95%  
87 CI: 2.2-4.3) of neonates from mothers infected with SARS-CoV-2 had a positive result based on  
88 viral RNA testing of nasopharyngeal swabs [5]. SARS-CoV-2 viral RNA testing was positive in  
89 neonatal cord blood (2.9% samples), placental swabs (7.7%), and fecal or rectal swabs, whereas  
90 it was negative in urine and amniotic fluid samples. In contrast, a more recent systematic review  
91 article (2021), which covered the database up to September 2020, reported that newborn rates of  
92 the infection vary between 0% and 11.5% [6]. Nevertheless, due to the availability of only a few  
93 patients and studies, the exact rates of vertical transmission and fetal or neonatal morbidity and  
94 mortality cannot be ascertained.

95

96 Although SARS-CoV-2 primarily causes respiratory distress, it is also known to have  
97 extrapulmonary manifestations, including hematological, cardiovascular, endocrinological, and  
98 neurological complications, in the adult population [7-9]. Of these, neurological manifestations  
99 in pregnant women and their probable effect on fetuses and neonates are of primary concern.  
100 SARS-CoV-2 may gain entry into the central nervous system through the nasal mucosa, lamina  
101 cribrosa, and olfactory bulb or through retrograde axonal transport. SARS-CoV-2 also exhibits  
102 neurovirulence, triggering proinflammatory and prothrombotic cascades in the wake of cytokine  
103 storms, affecting brain vasculature, as well as the blood-brain barrier, mainly in the setting of the  
104 toxic-metabolic sequelae of multiorgan dysfunction frequently observed in SARS-CoV-2-  
105 positive patients [10,11]. Proinflammatory cytokines inhibit the proliferation of neuronal  
106 precursor cells, activate astrogliosis, and stimulate oligodendrocyte cell death, leading to  
107 abnormal neurodevelopment [3, 4]. Moreover, the elevated levels of maternal inflammatory  
108 cytokines (IL-1, IL-6, IL-8, and TNF- $\alpha$ ) as a consequence of infection during pregnancy can

109 disturb several characteristics of fetal brain development [12]. Notably, these pathological  
110 changes, which include deteriorated neuronal functions and atypical behavioral changes, can  
111 subsequently be seen in postnatal life and may increase the risk of schizophrenia, autism, and  
112 mental disorders [12, 13].

113  
114 Additionally, animal studies have shown that offspring from maternal immune activation animal  
115 models have schizophrenia and autism-related behaviors, including decreased sensorimotor  
116 gating, deficits in working memory and cognitive flexibility, increased anxiety, and enhanced  
117 sensitivity to amphetamines [14-16].

118  
119 Because of the plausible effects on neonates born to mothers with SARS-CoV-2 infections  
120 during pregnancy, this study assessed the developmental attainment at 10-12 months of neonates  
121 born to a cohort of mothers with SARS-CoV-2 infections during pregnancy in Kuwait using the  
122 Ages and Stages Questionnaire, 3rd edition (ASQ-3).

123

## 124 **2 Methods**

### 125 **2.1 Participants**

126 In this prospective cohort study, infants born between April 1 and August 30, 2020, to mothers  
127 with SARS-CoV-2 infection during various trimesters of pregnancy were evaluated. Pregnant  
128 women who tested positive by reverse transcription-polymerase chain reaction (RT-PCR) for  
129 SARS-CoV-2 (Cobas 6800 Systems, Roche, Switzerland)/(TaqPath, Thermo-Fisher Scientific,  
130 USA) were identified from the Kuwait National COVID-19 registry. Mothers with equivocal  
131 RT-PCR test results and those with missing data were not included in the study. Verbal informed

132 consent was obtained from all the parents who participated in the study. Ethics approval was  
133 granted by the Ministry of Health, (2021-1638), Government of Kuwait.

134 Demographic details were collected for all infants enrolled in the follow-up study. Maternal  
135 clinical and neonatal data from acute hospital admissions were collected by retrospective chart  
136 review of the included participants and have been previously published [17].

## 137 **2.2 Instrument**

138 The ASQ-3 (<http://agesandstages.com/>) is a widely used screening tool for assessing  
139 development in children aged 1–66 months at a low cost, with cutoff scores identifying  
140 developmental delays. The screening tool has strong validity, and its use has been widespread in  
141 assessing development in children [18]. The ASQ-3 has five domains: communication, gross  
142 motor skills, fine motor skills, problem-solving capacity, and personal-social development.

143 In the current study, we used the ASQ-3 to assess neurodevelopmental outcomes at 10-12  
144 months postdischarge. Parents of infants completed the ASQ-3, which has a series of 21  
145 developmental screening questions. Three study investigators (MAL, MK, and AE) scored the  
146 questionnaire results using the ASQ-3 age-specific scoring sheet. In each domain, six items were  
147 scored as present in the infant, sometimes present or not yet shown by the infant, with 10, 5, and  
148 0 points, respectively. If an item was not filled in, a score of 0 was assigned based on the lowest  
149 possible result. Responses were summed to give a score of 0 to 60 for each domain and an  
150 overall maximum ASQ-3 score of 300 points. ASQ-3 results were categorized according to  
151 questionnaire-defined subscale cutoff scores into 1) developmental delays, with an ASQ-3 cutoff  
152 score of  $\leq 2$  standard deviations (SDs) below the population mean on 1 or more domains, and 2)  
153 no delay, with a cutoff score  $> 2$  SDs above the population mean [18].

154 The questionnaire was sent in two languages: the Arabic version for Arabic-speaking parents and  
155 the English version for non-Arabic-speaking parents. The questionnaire was completed by  
156 parents and reviewed in a telephone interview with one investigator. Parents were encouraged to  
157 provide their responses with their interpretation without prompting.

158

### 159 **2.3 Statistical analysis**

160 All data were entered into a Microsoft Excel database. Categorical variables were summarized as  
161 counts (n) and percentages (%), and continuous variables were summarized as the median and  
162 interquartile range (IQR). Statistical comparisons between the groups were performed using the  
163 chi-squared test for categorical variables and the Wilcoxon rank-sum test for continuous  
164 variables.

165 We performed a multivariate logistic regression analysis for each potential predictor of  
166 developmental delays. Variables with a P value of <0.1 on the univariate analysis were included  
167 in the model (maternal age and trimester at SARS-CoV-2 infection) and adjusted for gestational  
168 age, birth weight, sex, parental education and type of feeding in the first 6 months of age. The  
169 results of the regression analysis are presented as an adjusted odds ratio (aOR) with a 95% CI.  
170 Statistical significance was taken at  $P < 0.05$ . Statistical analysis was performed with **STATA 14**  
171 software (**Stata** Corporation, College Station, TX).

172

### 173 **3 Results**

174 Eight hundred forty pregnant women were identified from the national COVID-19 registry  
175 between April 1 and August 30, 2020. Four hundred forty-five women gave birth during the



176 study period (**Figure 1**). One infant died on the first day of life due to severe birth asphyxia; 298  
177 (67%) had complete follow-up at 10-12 months corrected age, and 146 (32.8%) infants were lost  
178 to follow-up. The main reason for the loss to follow-up was the inability to contact the parents  
179 due to either invalid contact information or parents having left the country. To determine  
180 whether the infants we lost to follow-up were representative of the complete study and to avoid  
181 attrition bias, we compared the baseline features of those infants with follow-up data with the  
182 baseline features of infants who were lost to follow-up. We did not find any statistically  
183 significant differences between these two groups.

184 The maternal and neonatal characteristics of the cohort are shown in **Table 1**.

185 Among the infants with completed ASQ-3, 5 (1.7%) were born to mothers diagnosed with  
186 SARS-CoV-2 during the first trimester, 20 (6.7%) during the second trimester, and 273 (91.6%)  
187 during the third trimester. Only 2 (0.7%) neonates tested positive for SARS-CoV-2 infection.  
188 Twenty-eight infants needed hospitalization beyond the first 8-10 months of age.

189 Parental questionnaires were collected at a median of 10.3 months corrected age (IQR 10 to  
190 12.7). Developmental delays were identified in 30 (10.1%) of the infants. Of those with  
191 developmental delays, 3.3% (1/30) had delays in the communication domains, 27% (8/30) in the  
192 gross motor domain, 40% (12/30) in the fine motor domain, 10% (3/30) in the problem-solving  
193 domain, and 30% (9/30) in the personal-social domain (**Figure 2**).

194 In the infants with developmental delays, 4 had concerns in two or more domains, and none had  
195 concerns in all domains.

196 Infants with developmental delays did not differ in terms of maternal age, maternal  
197 comorbidities, parental education level, severe maternal COVID-19, or the mode of delivery

198 compared to those with no delay (**Table 2**). However, the occurrence of developmental delays  
199 differed significantly on the basis of the trimester at SARS-CoV-2 infection. Developmental  
200 delays were more common in infants born to mothers with COVID-19 during the first and  
201 second trimesters than in infants born to mothers with COVID-19 during the third trimester  
202 ( $P<0.001$ ). Among infants with developmental delays, 4 (13.3%) were born to mothers with  
203 SARS-CoV-2 infection during the first trimester, 6 (20%) were born to mothers with SARS-  
204 CoV-2 infection during the second trimester, and 20 (66.7%) were born to mothers with SARS-  
205 CoV-2 infection in the third trimester. One (0.4%) of the infants without delay was born to a  
206 mother with SARS-CoV-2 infection in the first trimester, 14 (5.2%) were born to mothers with  
207 SARS-CoV-2 infections in the second trimester, and 253 (94.4%) were born to mothers with  
208 SARS-CoV-2 infections in the third trimester. Moreover, infants born at less than 31 weeks  
209 gestation were more likely to have developmental delays than infants born at more than 31  
210 weeks gestation (10% versus 0.8%;  $P=0.002$ ). Neonatal characteristics were similar between the  
211 groups.

212 In multivariate logistic regression analysis, adjusting for maternal age, parental educational level,  
213 gestational age, birth weight, and the type of feeding in the first six months of age, the risk of  
214 developmental delays was higher with first-trimester maternal SARS-CoV-2 infection (aOR: 8.2,  
215 95% CI: 1.1-55.9;  $P=0.039$ ) and second-trimester maternal SARS-CoV-2 infection (aOR: 8.1,  
216 95% CI: 2.4-27.7;  $P=0.001$ ) than with third-trimester maternal SARS-CoV-2 infection (**Table 3**).

#### 217 **4 Discussions**

218

219 The fetal inflammatory response (FIRS) due to maternal SARS-CoV-2 infection can contribute  
220 to severe neonatal morbidity, which includes stillbirth, neonatal death, preterm birth, low birth

221 weight, fetal distress, and neonatal asphyxia [19-21]. This is perhaps the first study reporting  
222 neurological assessments of neonates born to mothers from West Asia with SARS-CoV-2-  
223 positive RT-PCR test results during pregnancy using the ASQ-3. The findings of this study  
224 indicate that infants born to mothers who test positive for SARS-CoV-2 infection during  
225 pregnancy need to be assessed for neurodevelopmental delays.

226  
227 To assess the developmental attainment of infants born to mothers with SARS-CoV-2-positive  
228 test results during pregnancy, this study employed the ASQ-3, a screening tool used for assessing  
229 the developmental attainment of infants and young children [18]. This screening tool is used  
230 widely in assessing development in children aged 1–66 months at a low cost, with cutoff scores  
231 identifying developmental delays. In the current study, an Arabic version of the ASQ-3 was used  
232 for mothers who were well versed in Arabic. Since the study cohort included diverse as well as  
233 immigrant mothers, questionnaires were sent to mothers, and fortunately, the majority of them  
234 consented to respond.

235  
236 The study data revealed that the majority (91.6%) of the pregnant women had SARS-CoV-2  
237 infection during their third trimester, whereas 6.7% had SARS-CoV-2 infection in their second  
238 trimester. This finding is in agreement with those of other studies that have also reported that  
239 most SARS-CoV-2 infections in pregnant women occur in their third trimester [22, 23]. In the  
240 current study, only a relatively small number of women were infected during the first trimester.  
241 However, first-trimester infections are important as the principal stages of brain development,  
242 such as primary neurulation (weeks 3–4), prosencephalic development (months 2–3), and  
243 neuronal proliferation (months 3–4), occur during the early stages of pregnancy [24]. In fact,

244 infections with some common pathogens, such as cytomegalovirus (CMV), Zika virus, Rubella  
245 virus, *Mycobacterium tuberculosis* (TB), and *Toxoplasma gondii*, during the first and early  
246 second trimesters increase the risk of symptomatic infants, with up to 32% being associated with  
247 neurological manifestations [25]. Owing to the relatively recent emergence of COVID-19,  
248 information related to pregnancy outcomes among women with SARS-CoV-2 infection and the  
249 consequences of infant exposure to the virus is very scarce. As more women become infected  
250 during their first and second trimesters progress in their pregnancy and as newborns with SARS-  
251 CoV-2 infection develop, a better understanding of the neurological effects of this novel virus  
252 will emerge. In brief, various types of evidence support the theory that maternal infection and/or  
253 inflammation occurring during critical periods of fetal development could alter brain structure  
254 and function in a time-sensitive manner.

255 Nevertheless, SARS-CoV-2 infection increases the chances of fetal distress, leading to high  
256 incidences of admission to the neonatal intensive care unit (NICU) [23]. Similar to other reported  
257 studies, in the current study, 76 out of 298 (25.5%) neonates born to mothers with SARS-CoV-2-  
258 infection during pregnancy required NICU admission [26-29]. On the other hand, a systematic  
259 review reported that approximately 95% of neonates born to mothers with SARS-CoV-2  
260 infection during pregnancy were born in good condition [1].

261  
262 Recent evidence suggests that vertical transmission of SARS-CoV-2 either antenatally or  
263 intrapartum can occur, but it is uncommon. In this study, only 2 (0.7%) neonates tested positive  
264 for SARS-CoV-2 infection, and notwithstanding some seemingly perinatal complications, the  
265 majority of neonates (296 out 298) born were negative for SARS-CoV-2 infection. Our  
266 observation is in agreement with those of other studies [30-32], which implies that the

267 consequences of SARS-CoV-2 infection on neurodevelopment were largely due to in utero  
268 effects rather than direct effects on the fetus. The reason for the low vertical transmission rate is  
269 that the placenta has low expression of the canonical receptors necessary for viral entry, which  
270 may explain the rarity of vertical transmission of SARS-CoV-2 [32]. Importantly, teratogenic  
271 effects of SARS-CoV-2 on the fetus were not observed, which is in contrast to other viral  
272 infections, such as Middle East respiratory syndrome coronavirus, CMV, herpes virus, Zika  
273 virus, and Rubella virus infections [33-37].

274  
275 In this study, we evaluated the infant's neurobehavioral development 10-12 months post  
276 discharge, perhaps the adequate duration for effects to appear. In this study, overall, 69.1% of  
277 neonates at the end of 10-12 months showed normal developmental attainment, and only 10.1%  
278 (n=30) showed developmental delays. The PregCOV-19 living systematic review [1] found that  
279 approximately 95% of neonates born to SARS-CoV-2-positive mothers were reported to be born  
280 in good condition. However, it is not clear whether this systematic review included evaluations  
281 of neurodevelopmental delays in neonates. A study from the UK, in which information about  
282 educational and behavioral problems was collected from 177 children, found that 25% required  
283 support from a nonteaching assistant, 4% required a statement of special educational needs, and  
284 3% were in a special school [38]. Many investigators have studied the effects of various viral  
285 infections, albeit not SARS-CoV-2, on pregnancy and fetal/neonatal outcomes and have reported  
286 that maternal influenza, hepatitis C, varicella-zoster, and other viruses produce distinct fetal  
287 brain structure and anatomy clinical pathology of varying severity [39-42].

288

289 Of note, the role of cytokine storms, particularly the role of IL-6 in the pathogenesis of  
290 neurodevelopmental disorders, is not fully elucidated; however, in a longitudinal study,  
291 alterations in brain architecture, executive function, and working memory abilities were reported  
292 in 2-year-old neonates exposed to increased IL-6 levels during pregnancy [43]. An analysis of  
293 214 patients with SARS-CoV-2 infection revealed that 36% had neurological symptoms [44].  
294 Many case-control studies have demonstrated that elevated maternal cytokine levels affect the  
295 fetal brain, causing neurological disease [45-47]. The FIRS, due to increased IL-6 following  
296 maternal SARS-CoV-2 infection [13], may induce a wide range of adverse neurodevelopmental  
297 sequelae, such as autism, psychosis, and neurosensory deficits, later in life [48], similar to certain  
298 bacterial infections [49]. However, long-term longitudinal studies are required to validate these  
299 associations.

300  
301 Moreover, the risk of neurological effects on neonates differs by the trimester when SARS-CoV-  
302 2 infection occurred [50]. In this study, developmental delays were relatively more prevalent  
303 when infection occurred in the first and second trimesters than when infection occurred in the  
304 third trimester ( $P < 0.001$ ). Neonatal characteristics were similar between the groups. Moreover,  
305 infants born at less than 31 weeks gestation were more likely to have developmental delays than  
306 those born at more than 31 weeks gestation (10% versus 0.8%;  $P = 0.002$ ).

307 The findings of the study may be considered reliable, as the cohort of parents who participated in  
308 the study was well educated, and women were young (median age: 31 years). Three-fourths of  
309 women were devoid of pregnancy-induced hypertension or gestational diabetes.

## 310 **5 Strength and Limitations**

311 This is perhaps the first study reporting neurological assessments of neonates born to mothers  
312 with SARS-CoV-2-positive RT-PCR test results during pregnancy using the ASQ-3. The  
313 participating mothers were from the local area, which enabled good tracking for follow-ups.  
314 Participants were educated and responded to ASQ-3 questions appropriately. Thus, these points  
315 may be regarded as strength of the study.

316  
317 This study also has a few limitations, the most important aspects of which are related to the  
318 sample size and methodology. For stronger conclusions, a larger and statistically valid sample  
319 size is required. Furthermore, the ASQ-3 were completed by the parents of the neonates; hence,  
320 biases in reporting cannot be ruled out. Nevertheless, this initial study may help healthcare  
321 authorities understand the need to assess the developmental attainment of infants born to mothers  
322 with SARS-CoV-2-positive test results during pregnancy. The ASQ-3, although a good  
323 screening tool, has limitations, and its results may not be strongly comparable to those of other  
324 tools, such as the Bayley III test; therefore, further larger studies with formal assessments of  
325 neurodevelopment are warranted.

326

## 327 **6 Conclusions**

328 This study was a hypothesis-generating study, and the findings based on a screening tool raise  
329 some concerns regarding neurodevelopmental effects on fetuses born to mothers with SARS-  
330 CoV-2-positive test results during pregnancy. A majority of the pregnant women had SARS-  
331 CoV-2 infections during their third trimester. Developmental delays were more prevalent when  
332 SARS-CoV-2 infection occurred in the first and second trimesters than when it occurred in the  
333 third trimester. Infants born at less than 31 weeks gestation were more likely to have

334 developmental delays than those born at more than 31 weeks gestation. Further larger studies  
335 with formal developmental assessments are warranted to study the effect of SARS-CoV-2 on the  
336 developing brain.

### 337 **Abbreviations**

338 MIS-N: Multisystem inflammatory syndrome in neonates

339 SARS-CoV-2: Severe acute respiratory syndrome coronavirus-2

340 COVID-19: Coronavirus disease 2019

341 RT-PCR: Reverse transcriptase-polymerase chain reaction

342 CDC: Centers for Disease Control

343 CRP: C-reactive protein

344 IL: Interleukin

345 FIRS: Fetal inflammatory response

346

347

### 348 **Declarations:**

#### 349 **Ethics approval and consent to participate**

350 Ethics approval was granted by the Ministry of Health, (2021-1638), Government of Kuwait.

#### 351 **Availability of data and materials**



352 Not applicable

353 **Competing interests**

354 The authors declare that they have no competing interests

355 **Funding**

356 None

357 **Authors' contributions**

358 MA conceptualized and planned the study design, planned data collection, oversaw data  
359 collection , literature review, performed the text mining analysis, drafted and revised the final  
360 version of the manuscript. MA also performed the statistical analysis. AE, MK, MA, ZA, ZB,  
361 YB and HA conducted the literature review, contributed to the writing and reviewing of the  
362 manuscript. All other co-authors contributed to data collection and oversaw the manuscript.

363 **Acknowledgements**

364 We would like to thank the respective register holders; Maternal and Perinatal COVID-19  
365 Kuwait National Registry.

366

367

368

369 **References:**

- 370 1. Allotey J, Stallings E, Bonet M, Yap M, Chatterjee S, Kew T, et al. Clinical  
371 manifestations, risk factors, and maternal and perinatal outcomes of coronavirus disease  
372 2019 in pregnancy: living systematic review and meta-analysis. *BMJ*. 2020;  
373 doi: <https://doi.org/10.1136/bmj.m3320>.

374

375 2. la Cour Freiesleben N, Egerup P, Hviid KVR, Severinsen ER, Kolte AM, Westergaard  
376 D.SARS-CoV-2 in first trimester pregnancy: a cohort study. Hum Reprod. 2021;doi:  
377 10.1093/humrep/deaa311.

378

379 3. Marodi L. Neonatal innate immunity to infectious agents. Infect Immun. 1999–2006  
380 doi:10.1128/IAI.74.4.1999-2006.2006.

381

382 4. van Well GTJ, Daalderop LA, Wolfs T, Kramer BW. Human perinatal immunity in  
383 physiological conditions and during infection. Mol Cell Pediatr.2017;  
384 doi:10.1186/s40348-017-0070-1.

385 5. Kotlyar AM, Grechukhina O, Chen A, Popkhadze S, Grimshaw A, Tal O, et al. Vertical  
386 transmission of coronavirus disease 2019: a systematic review and meta-analysis. Am J  
387 Obstet Gynecol. 2021;doi.org/10.1016/j.ajog.2020.07.049.

388

389 6. Vergara-Merino L, Meza N, Couve-Perez C, Carrasco C, Ortiz-Munoz L, Madrid E,  
390 Bohorquez-Blanco S, Preze-Bracchiglinoe J. Maternal and perinatal outcomes related to  
391 COVID-19 and pregnancy: An overview of systematic of systematic reviews. Acta  
392 Obstet Gynecol Scand. 2021; doi: 10.1111/aogs.14118.

393

394 7. Guan W, Ni Z, Hu Y, Liang W, Ou C, He J, et al. Clinical Characteristics of Coronavirus  
395 Disease 2019 in China. N Engl J Med. 2020;doi: 10.1056/NEJMoa2002032.

396

- 397 8. Zhou F, Yu T, Du R, Fan G, Liu Y, Liu Z, et al. Clinical course and risk factors for  
398 mortality of adult inpatients with COVID-19 in Wuhan, China: a retrospective cohort  
399 study. *Lancet*. 2020; doi: 10.1016/S0140-6736(20)30566-3.  
400
- 401 9. Driggin E, Madhavan MV, Bikdeli B, Chuich T, Laracy J , Biondi-Zoccai G, et al.  
402 Cardiovascular considerations for patients, health care workers, and health systems  
403 during the coronavirus disease 2019 (COVID-19) pandemic. *J Am Coll Cardiol*.  
404 2020;**75**:2352–71.  
405
- 406 10. Jackson SP, Darbousset R, Schoenwaelder SM. Thromboinflammation: challenges of  
407 therapeutically targeting coagulation and other host defense mechanisms. *Blood*. 2020;  
408 doi:10.1182/blood-2018-11-882993.  
409
- 410 11. Mehta P, McAuley DF, Brown M, Sanchez E, Tattersall RS, Manson JJ, et al. COVID-  
411 19: Consider cytokine storm syndromes and immunosuppression.  
412 *Lancet*.2020;doi:10.1016/S0140-6736(20)30628-0.  
413
- 414 12. Mor G, Aldo P, Alvero AB. The unique immunological and microbial aspects of  
415 pregnancy. *Nat Rev Immunol*.2017; doi.org/10.1038/nri.2017.64.
- 416 13. Shi L, Tu N, Patterson PH. Maternal influenza infection is likely to alter fetal brain  
417 development indirectly: the virus is not detected in the fetus. *Int J Dev Neurosci*.2005;  
418 doi:10.1016/j.ijdevneu.2004.05.005.

- 419 14. Patterson HP. Immune involvement in schizophrenia and autism: etiology, pathology and  
420 animal models. *Behav Brain Res.*2009; doi: 10.1016/j.bbr.2008.12.016.
- 421 15. Knuesel I, Chicha L, Britschgi M, Schobel SA, Bodmer M, Hellings JA, et al. Maternal  
422 immune activation and abnormal brain development across CNS disorders. *Nat Rev*  
423 *Neurol.*2014; doi: 10.1038/nrneurol.2014.187.
- 424 16. Meyer U. Prenatal poly(i:C) exposure and other developmental immune activation  
425 models in rodent systems. *Biol Psychiatry.* 2014;75:307–15.
- 426 17. Ayed A, Embaireeg A, Benawadh A, Al-Fouzan W, Hammoud M, Al-Hathal M,  
427 Alzaydai A, et al. Maternal and perinatal characteristics and outcomes of pregnancies  
428 complicated with COVID-19 in Kuwait. *BMC Pregnancy Childbirth.* 2020; doi:  
429 10.1186/s12884-020-03461-2.
- 430 18. Squire J, Twombly E, Bricker D, Potter L. *ASQ-3: User’s guide.* Baltimore: Paul H.  
431 Brookes Publishing Co.; 2009.
- 432 19. Di Mascio D, Khalil A, Saccone G , Rizzo G, Buca D, Liberati M, et al. Outcome of  
433 coronavirus spectrum infections (SARS, MERS, COVID-19) during pregnancy: a  
434 systematic review and meta-analysis. *Am J Obstet Gynecol.*  
435 2020;doi.org/10.1016/j.ajogmf.2020.100107
- 436 20. Maheshwari B, Sharma P, Panwar K, Goswami KG. Evaluation of maternal and fetal  
437 outcome in corona positive pregnant women. *Int J Reprod Contra Obstet Gynecol.* 2020;  
438 doi:10.18203/2320-1770.ijrcog20205244.
- 439 21. Zhu H, Wang L, Fang C, Peng S, Zhang L, Chang G, Xia S. Clinical analysis of 10  
440 neonates born to mothers with 2019-nCoV pneumonia. *Transl Pediatr.* 2020;9:51–60.

- 441 22. Chen H, Guo J, Wang C, Luo F, Yu X, Zhang W, et al. Clinical characteristics and  
442 intrauterine vertical transmission potential of COVID-19 infection in nine pregnant  
443 women: a retrospective review of medical records. *Lancet*.2020;doi:10.1016/S0140-  
444 6736(20)30360-3.
- 445 23. Smith V, Seo D, Warty R, Payne O, Salih M, Chin KL, et al. Maternal and neonatal  
446 outcomes associated with COVID-19 infection: A systematic review. *PLoS One*. 2021;  
447 doi.org/10.1371/journal.pone.0234187.
- 448 24. Cordeiro CN, Tsimis M, Burd I. Infections and brain development. *Obstetrical &*  
449 *gynecological survey*. 2015; doi: 10.1097/OGX.0000000000000236.
- 450 25. Curcio AM, Shekhawat P, Reynolds AS, Thakur KT. Neurologic infections during  
451 pregnancy. In *Handbook of Clinical Neurology*. Elsevier; 2020. p. 79-104.
- 452 26. Hassan N, Muzamil M, Banday D. COVID-19 infection during pregnancy - maternal and  
453 perinatal outcomes: a tertiary care center study. *Int J Reprod Contracept Obstet Gynecol*.  
454 2020; doi:org/10.18203/2320-1770.ijrcog20203853.
- 455 27. Dong Y, Mo X, Hu Y, Qi X, Jiang F, Jiang Z, et al. Epidemiology of COVID-19 Among  
456 Children in China. *Pediatrics*. 2020; doi: 10.1542/peds.2020-0702.
- 457 28. Lu X, Zhang L, Du H. SARS-CoV-2 infection in children. *N Engl J Med*.2020;  
458 doi: 10.1056/NEJMc2005073.
- 459 29. ShekerdemianLS, Mahmood NR, Wolfe KK, Riggs BJ, Ross CE, McKiernan CA, et al.  
460 Characteristics and outcomes of children with coronavirus disease 2019 (COVID-19)  
461 infection admitted to US and Canadian pediatric intensive care units. *JAMA*  
462 *Pediatr*.2020; doi:10.1001/jamapediatrics.2020.1948.

- 463 30. Alzamora MC, Paredes T, Caceres D, Webb C, Valdez LM, La Rosa M. Severe COVID-  
464 19 during Pregnancy and Possible Vertical Transmission. *Am J Perinatol.* 2020;  
465 doi:10.1055/s-0040-1710050.
- 466 31. Chen H, Guo J, Wang C, Luo F, Yu X, Zhang W, et al. Clinical characteristics and  
467 intrauterine vertical transmission potential of COVID-19 infection in nine pregnant  
468 women: a retrospective review of medical records. *Lancet.*2020;doi:10.1016/S0140-  
469 6736(20)30360-3.
- 470 32. Peng Z, Wang J, Mo Y, Duan W, Xiang G, Yi M, et al. Unlikely SARS-CoV-2 vertical  
471 transmission from mother to child: A case report. *J Infect Public Health.* 2020;  
472 doi: 10.1016/j.jiph.2020.04.004.
- 473 33. WHO. Middle East respiratory syndrome coronavirus (MERS-CoV).  
474 <https://www.who.int/emergencies/mers-cov/en/> (2019).
- 475 34. Faure-Bardon V, Magny JF, Parodi M, Couderc S, Garcia P, Maillotte AM, et al.  
476 Sequelae of congenital cytomegalovirus following maternal primary infections are  
477 limited to those acquired in the first trimester of pregnancy. *Clin Infect Dis.* 2019;  
478 doi: 10.1093/cid/ciy1128.
- 479 35. Adams Waldorf KM, McAdams RM. Influence of infection during pregnancy on fetal  
480 development. *Reproduction.* 2013; doi: 10.1530/REP-13-0232.
- 481 36. Halai UM, Nielsen-Saines K, Moreira ML, Sequeira PC, Pereira Junior JS, Zin AA, et al.  
482 Maternal Zika virus disease severity, virus load, prior dengue antibodies, and their  
483 relationship to birth outcomes. *Clin Infect Dis.* 2017; doi: 10.1093/cid/cix472.

- 484 37. Dodd KC, Michael BD, Ziso B, Williams B, Borrow R, Krishnan A. Herpes simplex virus  
485 encephalitis in pregnancy—a case report and review of reported patients in the literature.  
486 BMC Res Notes 2015; doi:10.1186/s13104-015-1071-6.
- 487 38. Huddy CLJ, A Johnson A, Hope PL. Educational and behavioral problems in babies of  
488 32–35 weeks gestation. Arch Dis Child Fetal Neonatal Ed. 2001;  
489 doi: 10.1136/fn.85.1.F23.
- 490 39. Ellman LM, Yolken RH, Buka SL, Torrey EF, Cannon TD. Cognitive functioning prior  
491 to the onset of psychosis: the role of fetal exposure to serologically determined influenza  
492 infection. Biol Psychiatry. 2009;doi: 10.1016/j.biopsych.2008.12.015.
- 493 40. Parboosing R, Bao Y, Shen L, Schaefer CA, Brown AS. Gestational influenza and  
494 bipolar disorder in adult offspring. JAMA Psychiatry. 2013;  
495 doi: 10.1001/jamapsychiatry.2013.896.
- 496 41. Salemi JL, Whiteman VE, August EM, Chandler K, Mbah AK, Salihu HM.  
497 Maternal hepatitis B and hepatitis C infection and neonatal neurological outcomes. J  
498 Viral Hepat. 2014; doi: 10.1111/jvh.12250.
- 499 42. Marin M, Guris D, Chaves SS, Schmid S, Seward JF. Recommendations of the Advisory  
500 Committee on Immunization Practices (ACIP). MMWR Recomm Rep. 2007;56:1–40.
- 501 43. Rudolph MD, Graham AM, Feczko E, Miranda-Dominguez O, Rasmussen JM, Nardos  
502 R, et al. Maternal IL-6 during pregnancy can be estimated from newborn brain  
503 connectivity and predicts future working memory in offspring. Nat Neurosci.  
504 2018;doi: 10.1038/s41593-018-0128-y.

- 505 44. Mao L, Jin H, Wang M, Hu Y, Chen S, Quanwei He Q, et al. Neurologic Manifestations  
506 of Hospitalized Patients With Coronavirus Disease 2019 in Wuhan, China. *JAMA*  
507 *Neurol.* 2020; doi:10.1001/jamaneurol.2020.1127.
- 508 45. Ellman LM, Deicken RF, Vinogradov S, Kremen WS, Poole JH, Kern DM, et al.  
509 Structural brain alterations in schizophrenia following fetal exposure to the inflammatory  
510 cytokine interleukin-8. *Schizophr Res.*2010;doi:10.1016/j.schres.2010.05.014.
- 511 46. Gotsch F, Romero R, Kusanovic JP, Mazaki-Tovi S, Pineles BL, Erez O, et al. The fetal  
512 inflammatory response syndrome. *Clin Obstet Gynecol.*2007;  
513 doi: 10.1097/GRF.0b013e31811ebef6.
- 514 47. Buka SL, Tsuang MT, Torrey EF, Klebanoff MA, Wagner RL, Yolken RH. Maternal  
515 cytokine levels during pregnancy and adult psychosis. *Brain Behav Immun.* 2001;  
516 15:411–420.
- 517 48. Wong YP, Tan GC, Wong KK, Swaminathan A, Cheah FC. *Gardnerella vaginalis* in  
518 perinatology: An overview of the clinicopathological correlation. *Malays J*  
519 *Pathol.*2018;doi: org/10.3389/fped.2020.593802.
- 520 49. Seethy AA, Singh S, Mukherjee I, Pethusamy K, Purkayastha K, Sharma JB, et al.  
521 Potential SARS-CoV-2 interactions with proteins involved in trophoblast functions—An  
522 in-silico study. *Placenta.* 2021; doi: 10.1016/j.placenta.2020.10.027.
- 523 50. Wang Y, Chen L, Wu T, Shi H, Qin Li, Jiang H, et al. Impact of Covid-19 in pregnancy  
524 on mother’s psychological status and infant’s neurobehavioral development: a  
525 longitudinal cohort study in China. *BMC Medicine.*2020; doi:  
526 <https://doi.org/10.1186/s12916-020-01825-1>.
- 527



528

529

530

531

532

533

534

535

536

537

538

539

540

541

542

543

544

545

546 **Table 1:** Maternal and neonatal demographic and clinical characteristics

| Variable                                               | All (N= 298)  |                                 |              |
|--------------------------------------------------------|---------------|---------------------------------|--------------|
| <b>Maternal characteristics, N (%) or median (IQR)</b> |               |                                 |              |
| Age (years)                                            | 31 (27-35)    |                                 |              |
| Parity                                                 | 3 (2-4)       |                                 |              |
| Gestational diabetes                                   | 51 (17.1%)    |                                 |              |
| Pregnancy-induced hypertension                         | 26 (8.7%)     |                                 |              |
| <b>Maternal nationality</b>                            |               |                                 |              |
| Kuwaiti                                                | 112 (37.6%)   | Non-Kuwaiti                     | 186 (62.4%)  |
| <b>Maternal educational level</b>                      |               |                                 |              |
| Educated                                               | 297 (99%)     | Non-educated                    | 3 (1%)       |
| Elementary school                                      | 8 (2.7%)      | Middle school                   | 49 (16.4%)   |
| High school                                            | 38 (12.7%)    | Diploma holder                  | 47 (15.8%)   |
| Bachelor                                               | 147 (49.3%)   | Master and PhD                  | 6 (2%)       |
| <b>Paternal educational level</b>                      |               |                                 |              |
| Educated                                               | 297 (99.3%)   | Non-educated                    | 2 (0.7%)     |
| Elementary school                                      | 6 (2%)        | Middle school                   | 41 (13.8%)   |
| High school                                            | 66 (22.2%)    | Diploma holder                  | 57 (19.2%)   |
| Bachelor                                               | 119 (40.1%)   | Master and PhD                  | 6 (2%)       |
| <b>Gestational age at SARS-CoV-2 infection</b>         |               |                                 |              |
| <i>1<sup>st</sup> Trimester</i>                        | 5 (1.7%)      | <i>2<sup>nd</sup> Trimester</i> | 20 (6.7%)    |
| <i>3<sup>rd</sup> Trimester</i>                        |               |                                 | 273 (91.6%)  |
| (< 13 weeks)                                           | (13-26 weeks) |                                 | (> 26 weeks) |
| Maternal fever                                         | 123 (42%)     |                                 |              |
| Asymptomatic                                           | 103 (39.5%)   |                                 |              |

---

|                                                      |                  |                                    |            |
|------------------------------------------------------|------------------|------------------------------------|------------|
| Severe maternal COVID-19                             | 12 (6.9%)        |                                    |            |
| Maternal ECMO                                        | 3 (1%)           |                                    |            |
| Maternal total duration of symptoms, days            | 5.5 (3-10)       |                                    |            |
| <b>Neonatal characteristics, N (%), median (IQR)</b> |                  |                                    |            |
| <i>Mode of delivery</i>                              |                  |                                    |            |
| Vaginal birth                                        | 170 (57%)        | Cesarean section                   | 128 (43%)  |
| Multiple gestation                                   | 13 (6%)          |                                    |            |
| Gestational age, weeks                               | 38 (37-39)       |                                    |            |
| Birth weight, grams                                  | 3005 (2660-3440) |                                    |            |
| Male                                                 | 167 (56%)        | Female                             | 131 (44%)  |
| <b>Neonatal ICU admission (N=76)</b>                 |                  |                                    |            |
| Prematurity                                          | 55 (18.4%)       | Neonatal hyperbilirubinemia        | 6 (2%)     |
| Transient tachypnea of newborn                       | 6 (2%)           | Congenital heart disease           | 2 (0.7%)   |
| Hypoxic-ischemic encephalopathy                      | 3 (1%)           | Myelomeningocele                   | 1 (0.3%)   |
| Aqueduct stenosis                                    | 1 (0.3%)         | Epidermolysis bullosa              | 1 (0.3%)   |
| Early-onset Klebsiella sepsis                        | 1 (0.3%)         |                                    |            |
| SARS-CoV-2 infection PCR                             | 2 (0.7%)         |                                    |            |
| <b>Type of feeding in the first 6 months of age</b>  |                  |                                    |            |
| <i>Bottle feeding (formula)</i>                      | 50 (50.7%)       | <i>Breastfeeding (breast milk)</i> | 75 (25.3%) |
|                                                      |                  | <i>Mixed feeding</i>               | 71 (24%)   |

---

---

Further hospitalization in the first 8-10 months      28 (9.6%)  
of life

---

547 *Values are expressed as numbers (N) and percentages or medians and interquartile ranges*  
548 *(IQRs). Severe COVID-19: Defined as clinical signs of pneumonia plus SpO<sub>2</sub> less than 90% in*  
549 *room air or admission to an intensive care unit (ICU) for respiratory support (i.e., high-flow*  
550 *nasal cannula, noninvasive mechanical ventilation, and intubation). ECMO: extracorporeal*  
551 *membrane oxygenation.*

552

553

554

555

556

557

558

559

560

561

562

563

564 **Table 2:** Maternal and neonatal demographic and clinical characteristics by the ASQ-3 results

| Variable                                |                           | Developmental<br>delays<br>N= 30 | No delay<br>N= 268 | P value |
|-----------------------------------------|---------------------------|----------------------------------|--------------------|---------|
| Age, years                              |                           | 33 (30-37)                       | 31 (27-35)         | 0.089   |
| Parity                                  |                           | 2 (2-4)                          | 3 (2-4)            | 0.373   |
| Gestational diabetes                    |                           | 4 (13.3%)                        | 47 (17.5%)         | 0.562   |
| Pregnancy-induced hypertension          |                           | 4 (13.3%)                        | 22 (8.2%)          | 0.346   |
| Maternal nationality                    | Kuwaiti                   | 9 (30%)                          | 103 (38.4%)        | 0.366   |
|                                         | Non-Kuwaiti               | 21 (70%)                         | 165 (61.6%)        |         |
| Educational level                       | Diploma and above         | 20 (66.7%)                       | 180 (67.2%)        | 0.956   |
| Gestational age at SARS-CoV-2 infection | 1 <sup>st</sup> trimester | 4 (13.3%)                        | 1 (0.4%)           | <0.001  |
|                                         | 2 <sup>nd</sup> trimester | 6 (20%)                          | 14 (5.2%)          | *       |
|                                         | 3 <sup>rd</sup> trimester | 20 (66.7%)                       | 253 (94.4%)        |         |
| Maternal fever                          | Asymptomatic              | 10 (35.7%)                       | 113 (42.8%)        | 0.47    |
|                                         | Severe maternal COVID-19  | 11 (37.9%)                       | 92 (39.7%)         | 0.858   |
| Maternal ECMO                           |                           | 1 (6.7%)                         | 11 (6.9%)          | 0.966   |
| Maternal total duration of symptoms     |                           | 0                                | 3 (1.1%)           | 0.879   |
| Mode of delivery                        | Vaginal birth             | 5 (3-10)                         | 7 (3-10)           | 0.651   |
|                                         | Cesarean section          | 14 (46.7%)                       | 156 (58.2%)        | 0.226   |
|                                         |                           | 16 (53.3%)                       | 112 (41.8%)        |         |
| Multiple gestation                      |                           | 0                                | 13 (6.4%)          | 0.312   |

|                                              |                                      |                  |                  |        |
|----------------------------------------------|--------------------------------------|------------------|------------------|--------|
| Gestational age, weeks, median (IQR)         |                                      | 38 (37-39)       | 38 (37-39)       | 0.922  |
| Gestational age                              | 28-30 <sup>+6</sup> weeks            | 3 (10%)          | 2 (0.8%)         | 0.002* |
|                                              | 31-34 <sup>+6</sup> weeks            | 1 (3.3%)         | 8 (3%)           |        |
|                                              | 35-36 <sup>+6</sup> weeks            | 2 (6.7%)         | 39 (14.5%)       |        |
|                                              | >37 weeks                            | 24 (80%)         | 219 (81.7%)      |        |
| Birth weight, grams                          |                                      | 2950 (2400-3400) | 3030 (2680-3440) | 0.355  |
| Male                                         |                                      | 13 (43.3%)       | 154 (57.5%)      | 0.139  |
| SARS-CoV-2 infection PCR                     |                                      | 0                | 2 (0.7%)         | 0.363  |
| Neonatal diagnosis                           | Prematurity                          | 6 (20%)          | 49 (18.3%)       | 0.818  |
|                                              | Neonatal hyperbilirubinemia          | 1 (3.3%)         | 5 (1.9%)         |        |
|                                              | Transient tachypnoea of the newborn  | 2 (6.6%)         | 4 (1.5%)         |        |
|                                              | Hypoxic-ischemic encephalopathy      | 1 (3.3%)         | 1 (0.4%)         |        |
|                                              | Congenital heart disease             | 0                | 1 (0.4%)         |        |
|                                              | Myelomeningocele                     | 0                | 1 (0.4%)         |        |
|                                              | Aqueduct stenosis                    | 0                | 1 (0.4%)         |        |
|                                              | Early-onset <i>Klebsiella</i> sepsis | 0                | 1 (0.4%)         |        |
|                                              | Epidermolysis bullosa                | 0                | 1 (0.4%)         |        |
| Type of feeding in the first 6 months of age | Bottle feeding (formula)             | 13 (43.3%)       | 137 (51.5%)      |        |
|                                              | Breastfeeding (breast milk)          | 9 (30%)          | 66 (24.8%)       |        |
|                                              | Mixed feeding                        | 8 (26.7%)        | 63 (23.7%)       |        |

---

|                                                                    |          |           |      |
|--------------------------------------------------------------------|----------|-----------|------|
| Further hospitalization in the 1 <sup>st</sup> 8-10 months of life | 2 (6.7%) | 26 (9.9%) | 0.57 |
|--------------------------------------------------------------------|----------|-----------|------|

---

565 *Values are expressed as number (N) and percentage or median and interquartile range (IQR)*  
566 *Severe COVID-19: Defined as clinical signs of pneumonia plus SpO<sub>2</sub> less than 90% in room air*  
567 *or admission to intensive care unit (ICU) for respiratory support (i.e., high-flow nasal cannula,*  
568 *noninvasive mechanical ventilation, and intubation). ECMO: extracorporeal membrane*  
569 *oxygenation.*

570

571

572

573

574

575

576

577

578

579

580

581

582

583 **Table 3:** Multiple regression analysis of the association of demographic and clinical  
584 characteristics with developmental delays (ASQ-3 score less than 2 standard deviations below  
585 the population mean)

586

| Variable                               |                             | Adjusted odds ratio | 95% CI    | P value |
|----------------------------------------|-----------------------------|---------------------|-----------|---------|
| Trimester at                           | 3 <sup>rd</sup>             | Reference           |           |         |
| SARS-CoV-2 infection                   | 2 <sup>nd</sup>             | 8.1                 | 2.4-27.7  | 0.001*  |
|                                        | 1 <sup>st</sup>             | 8.2                 | 1.1-55.9  | 0.039*  |
| Maternal age                           |                             | 1.04                | 0.96-1.1  | 0.305   |
| Gestational age at birth               | 28-30 <sup>+6</sup> weeks   | 7.7                 | 0.69-85.8 | 0.090   |
|                                        | 31-34 <sup>+6</sup>         | 1.2                 | 0.13-10.7 | 0.870   |
|                                        | 35-36 <sup>+6</sup>         | 0.5                 | 0.10-2.3  | 0.371   |
|                                        | >37                         | Reference           |           |         |
| Maternal education (diploma and above) |                             | 1.8                 | 0.59-5.4  | 0.300   |
| Father education (diploma and above)   |                             | 0.5                 | 0.2-1.3   | 0.172   |
| Male                                   |                             | 1.6                 | 0.68-3.5  | 0.297   |
| Type of feeding in the first 6 months  | Mixed feeding               | Reference           |           |         |
|                                        | Bottle feeding (formula)    | 1.3                 | 0.46-3.4  | 0.652   |
|                                        | Breastfeeding (breast milk) | 0.5                 | 0.14-1.6  | 0.239   |

587

588 *Values are expressed as adjusted odds ratios and 95% confidence intervals (95% CIs).*



589

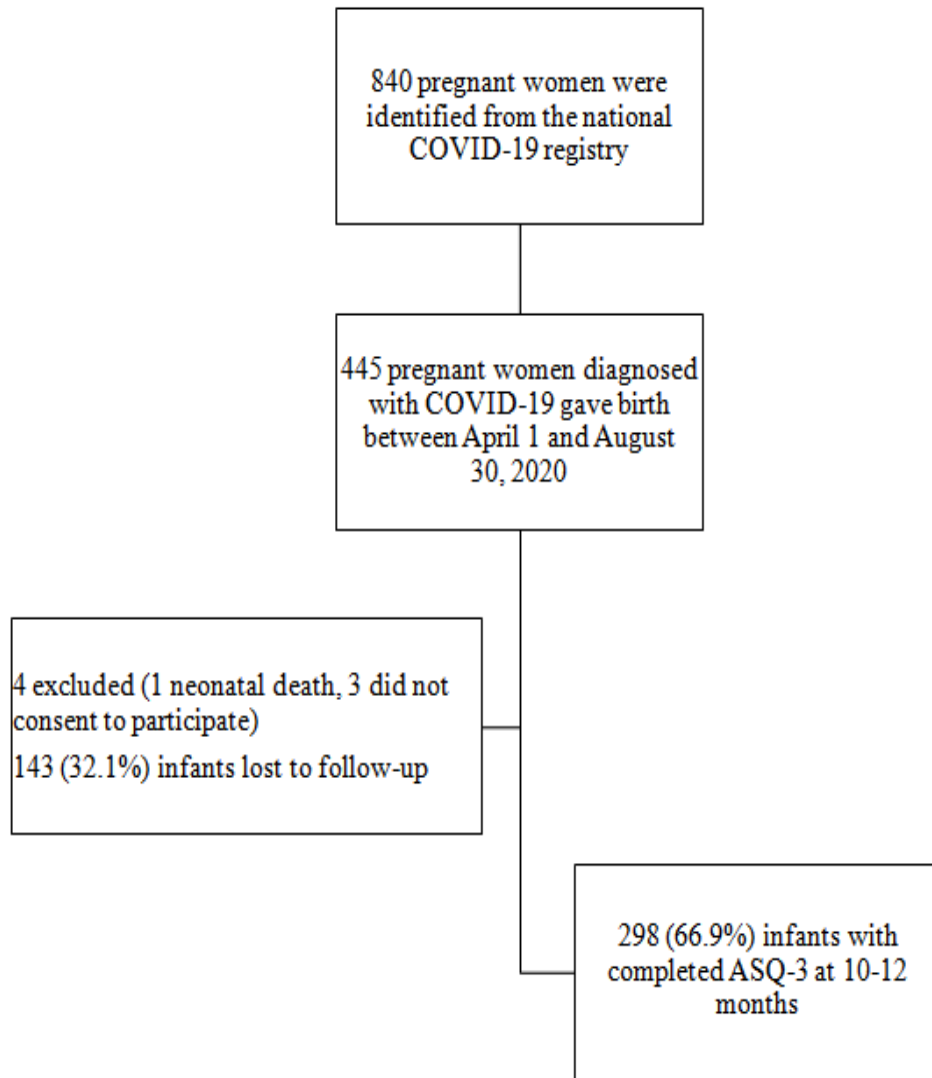

590

591

592

593

594

595

596

597 **Figure Legends:**

598 **Figure 1: Flowchart of the study recruitment and follow-up. ASQ-3: Ages and Stages**

599 **Questionnaire, 3rd edition**

600

601

602

603

604

605

606

607

608

609

610

611

612

613

614

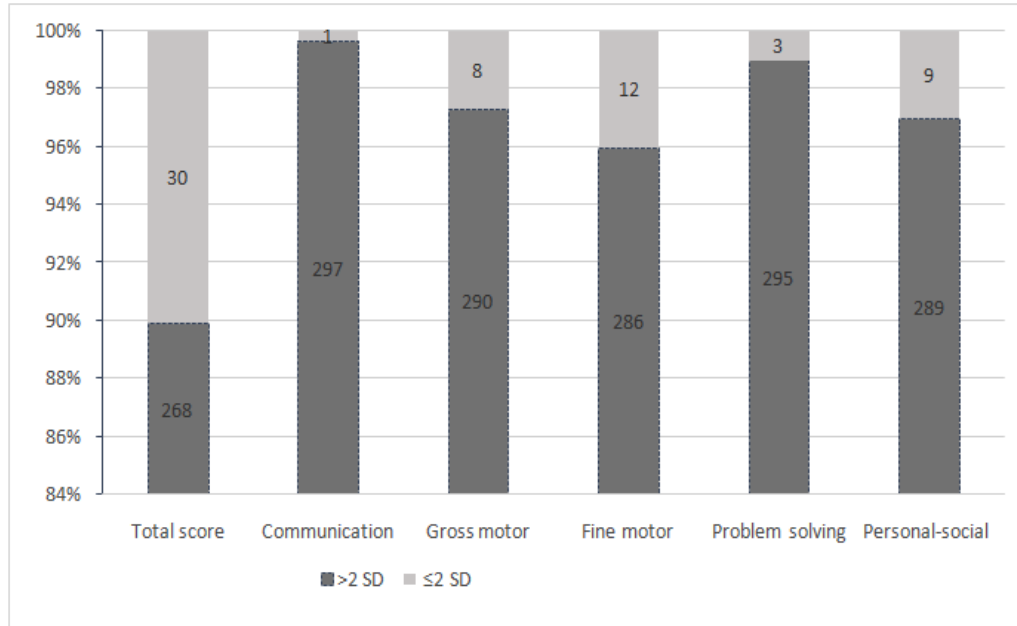

615

616

617

618

619 **Figure 2: Developmental outcome using the Ages and Stages Questionnaire, 3rd edition, at**

620 **10-12 months of age**

621

622 A bar graph presenting the total score and subscale scores of ASQ-3 domains.

623 A score with a standard deviation (SD)  $\leq 2$  below the population mean implies developmental

624 delays, and a score with an SD  $>2$  above the population mean is considered no delay.

625

626
